# Supplementary material
Source: publisher site journal article supplement (https://www.dovepress.com/article/372112)
Supplement: Supplementary file 1 [file get_supplementary_file.php]

Supplementary Table. Clinical and demographic details of patients and controls

| No. | gender | age | VIDA | Area  (%BSA) | Disease severity# | duration of  disease | interval since last treatment* | treatment regimen in this visit | serum samples collection |
| --- | --- | --- | --- | --- | --- | --- | --- | --- | --- |
| V1 | M | 30 | 4 | 1.6 | moderate | 6 months | first visit | oral prednison for 3 months (the dose was 0.3 mg·kg-1·d-1 for 1 month, decreased by 5 mg every 2 weeks and maintained at 5 mg/d) | 3 months after treatment |
| V2 | F | 72 | 4 | 1.6 | moderate | 2 months | first visit |
| V3 | M | 21 | 3 | 4.1 | moderate | 8 years | 6 months |
| V4 | F | 61 | 3 | 4.3 | moderate | 4 years | 3 months |
| V5 | F | 52 | 4 | 5.1 | moderate to severe | 10 years | 2 years |
| V6 | F | 40 | 4 | 7.2 | moderate to severe | 16 years | 9 months |
| V7 | F | 33 | 4 | 7.3 | moderate to severe | 11 months | 6 months |
| V8 | M | 18 | 3 | 8.0 | moderate to severe | 2 years | 6 months |
| V9 | F | 60 | 4 | 9.1 | moderate to severe | 18 years | 10 years |
| V10 | M | 50 | 4 | 15.4 | moderate to severe | 14 years | 5 months |
| H1 | F | 27 | NA | NA | NA | NA | NA | NA | NA |
| H2 | M | 30 | NA | NA | NA | NA | NA | NA | NA |
| H3 | F | 38 | NA | NA | NA | NA | NA | NA | NA |
| H4 | F | 45 | NA | NA | NA | NA | NA | NA | NA |
| H5 | M | 51 | NA | NA | NA | NA | NA | NA | NA |
| H6 | M | 19 | NA | NA | NA | NA | NA | NA | NA |
| H7 | F | 44 | NA | NA | NA | NA | NA | NA | NA |
| H8 | F | 35 | NA | NA | NA | NA | NA | NA | NA |
| H9 | M | 68 | NA | NA | NA | NA | NA | NA | NA |
| H10 | F | 61 | NA | NA | NA | NA | NA | NA | NA |

V1-10: vitiligo patients; H1-10: healthy individuals; NA: not applicable; VIDA: vitiligo disease activity score; #: mild represents the area of vitiligo is less than 1%BSA, moderate represents the area of vitiligo is 1%-5%BSA, moderate to severe represents the area of vitiligo is 6%-50%BSA, severe represents the area of vitiligo is more than 50%BSA; *: it represents the time interval since last treatment with systemic glucocorticoids.
